# Supplementary material for: An optical strategy for detecting hypochlorite in vitro and cells with high selectivity and stability based on a lanthanide-doped upconversion probe
Source: Royal Society of Chemistry journal article supplement (doi:10.1039/d2ra05414k), 2022-01-01
Supplement: d2ra05414k1.pdf [file d2ra05414k1.pdf]

## Supporting Information

### Optical strategy for detecting hypochlorite in vitro and cell with high selectivity and stability based on lanthanide doped upconversion probe

Yuting Liu<sup>1,2</sup>, Shiping Zhan<sup>1,2\*</sup>, Xin Su<sup>1,2</sup>, Guozheng Nie<sup>1,2\*</sup>, Xiaofeng Wu<sup>3\*</sup>, Yunxin Liu<sup>1,2</sup>

<sup>1</sup> School of Physics and Electronic Science, Hunan University of Science and Technology, Xiangtan, 411201, China.

<sup>2</sup> Hunan Province Key Laboratory of Intelligent Sensors and Advanced Sensor Materials, Xiangtan, 411201, China.

<sup>3</sup> School of Mechatronic Engineering and Automation, Foshan University, Foshan, 528000, China.

\*Corresponding author: [spzhan86@163.com](mailto:spzhan86@163.com), [gzhnie@hnust.edu.cn](mailto:gzhnie@hnust.edu.cn), [xfwuvip@126.com](mailto:xfwuvip@126.com)

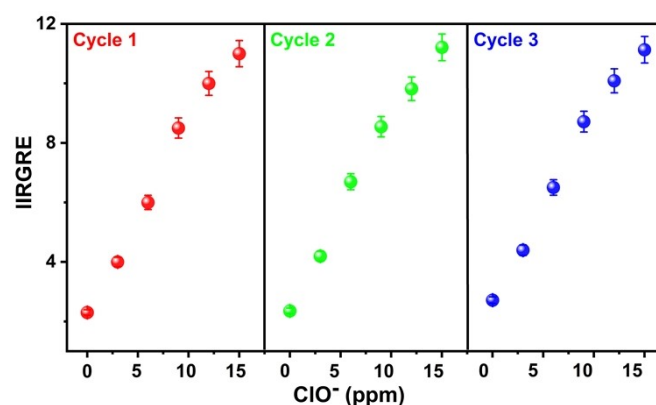

Fig. S1 The linear graph of IIRGRE and ClO<sup>-</sup> concentrations was repeated 3 times.

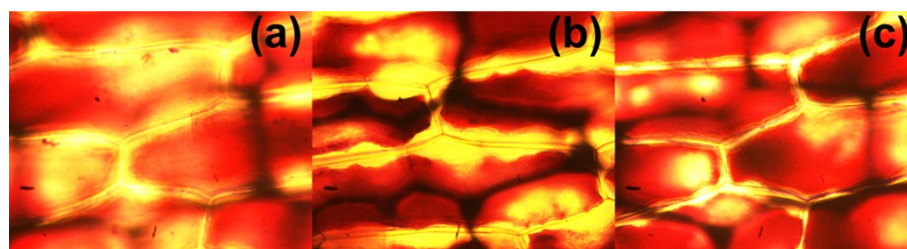

Fig. S2 (a) Onion cells loaded with probes; (b) Plasmolysis; (c) Deplasmolysis.

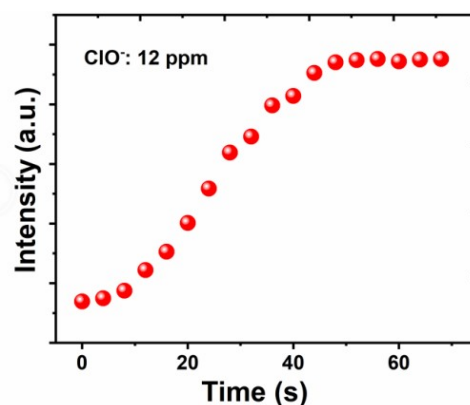

Fig. S3 Kinetic analysis of the surface modified upconversion probe towards ClO<sup>-</sup>.
